# Supplementary material for: Thrice daily consumption of a novel, premeal shot containing a low dose of whey protein increases time in euglycemia during 7 days of free-living in individuals with type 2 diabetes
Source: PubMed Central journal article supplement — BMJ Open Diabetes Res Care. 2022 May 25;10(3):e002820. doi: 10.1136/bmjdrc-2022-002820 (PMC9137348; doi:10.1136/bmjdrc-2022-002820), 2022-05-25
Supplement: bmjdrc-2022-002820supp001.pdf [file bmjdrc-2022-002820supp001.pdf]

Thrice daily consumption of a novel, pre-meal shot containing a low dose of whey protein increases time in euglycemia during 7 days of free-living in individuals with type 2 diabetes. K, Smith

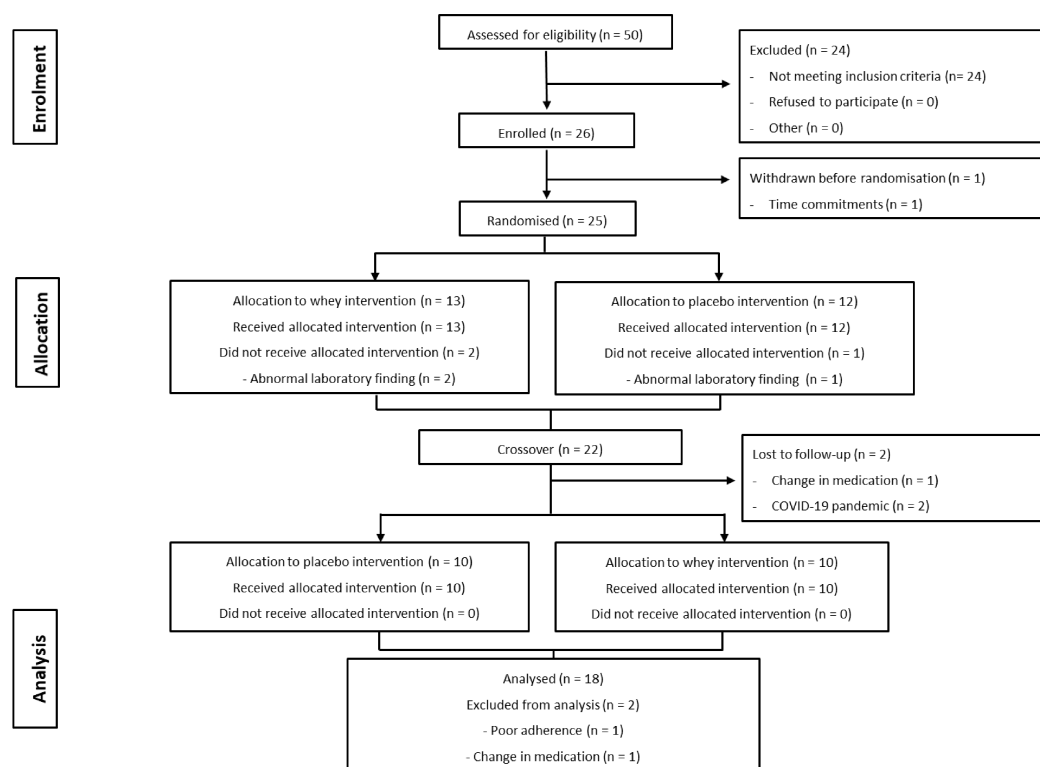

**Supplemental Figure 1:** CONSORT diagram of a randomized, placebo-controlled, crossover trial

Thrice daily consumption of a novel, pre-meal shot containing a low dose of whey protein increases time in euglycemia during 7 days of free-living in individuals with type 2 diabetes. K, Smith

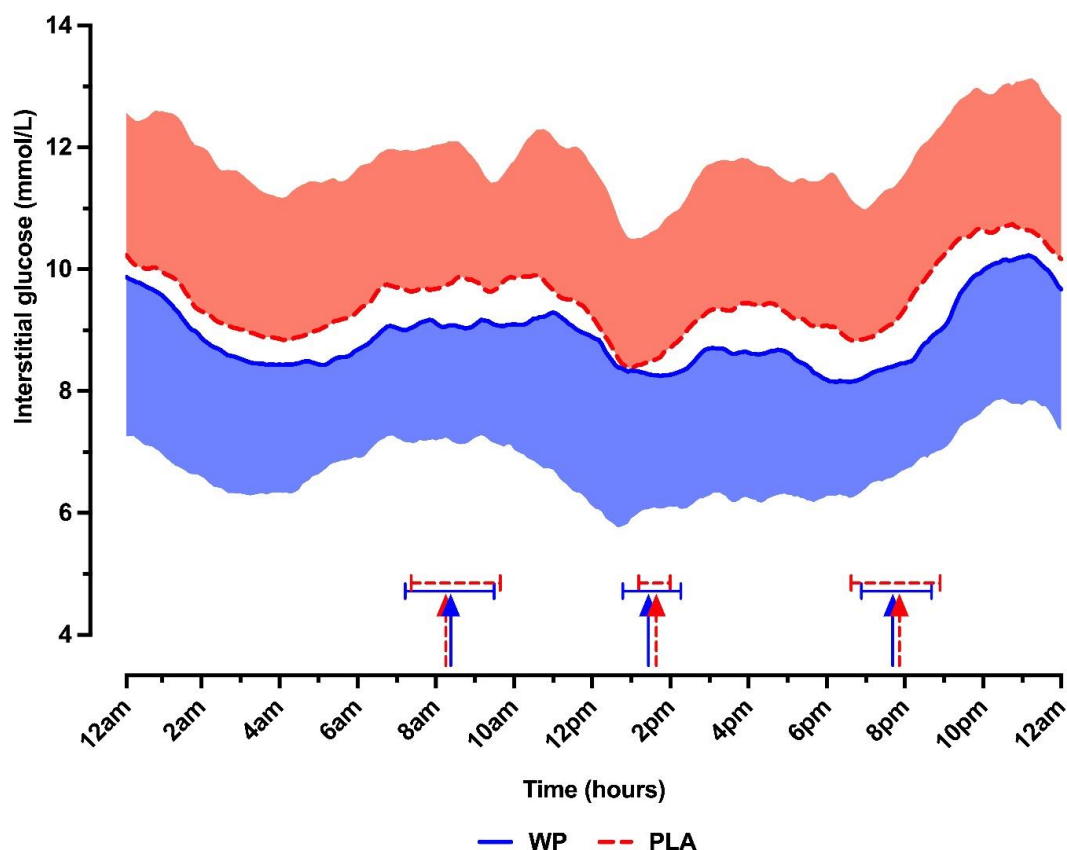

**Supplemental Figure 2:** Mean 24h interstitial glucose concentrations during 7 days of free-living following pre-meal treatment with WP (blue solid) or PLA (red dashed) pre-meal shots. The data presented represents the average daily glucose profile from individual CGM plots. The shaded areas represent the SD of the mean. Arrows and horizontal whiskers depict the mean  $\pm$  SD timing of meals, as reported by the Intake24 dietary recall and patient's supplement log. The average timing of breakfast, lunch and evening meals during the WP and PLA weeks were 08:31  $\pm$  1:18h:min and 08:29  $\pm$  1:18h:min, 13:27  $\pm$  0:52h:min and 13:40  $\pm$  0:37h:min, and 19:43  $\pm$  1:08h:min and 19:54  $\pm$  1:14h:min, respectively. The timing of matched meals per participant were similar between weeks.

Thrice daily consumption of a novel, pre-meal shot containing a low dose of whey protein increases time in euglycemia during 7 days of free-living in individuals with type 2 diabetes. K, Smith

**Supplemental Table 1:** Diurnal and nocturnal free-living glycaemic variability parameters

|                        | Daytime                  |                     |              | Nocturnal                |             |         |
|------------------------|--------------------------|---------------------|--------------|--------------------------|-------------|---------|
|                        | WP                       | PLA                 | p-value      | WP                       | PLA         | p-value |
| Mean glucose [mmol/L]  | 8.8 ± 1.9                | <b>9.5 ± 2.0*</b>   | <b>0.024</b> | 8.9 ± 2.1                | 9.3 ± 2.4   | 0.348   |
| < 3.0 mmol/L [%]       | 0.1 ± 0.4 <sup>a</sup>   | 0.1 ± 0.2           | 0.655        | 0.0 ± 0.0 <sup>a</sup>   | 0.2 ± 0.7   | 0.317   |
| 3.0 – 3.8 mmol/L [%]   | 0.8 ± 2.0 <sup>a</sup>   | 0.8 ± 2.4           | 1.0          | 0.1 ± 0.1 <sup>a</sup>   | 2 ± 8.5     | 0.317   |
| 3.9 – 10.0 mmol/L [%]  | 69.0 ± 23.1 <sup>a</sup> | <b>60.3 ± 26.9*</b> | <b>0.048</b> | 70.9 ± 33.0 <sup>b</sup> | 63.0 ± 32.4 | 0.082   |
| 10.0 – 13.9 mmol/L [%] | 24.8 ± 16.4 <sup>a</sup> | 30.7 ± 17.5         | 0.083        | 23.9 ± 27.2 <sup>a</sup> | 27.3 ± 24.4 | 0.349   |
| > 13.9 mmol/L [%]      | 5.5 ± 9.5                | 8.6 ± 12.5          | 0.266        | 5.6 ± 8.5 <sup>a</sup>   | 8.0 ± 19.0  | 0.638   |
| > 10 mmol/L [%]        | 30.0 ± 23.6 <sup>a</sup> | <b>38.9 ± 27.7*</b> | <b>0.048</b> | 29.0 ± 33.0 <sup>a</sup> | 35.0 ± 33.6 | 0.102   |

Boldface indicates a statistical difference between treatments as determined by a paired samples t test or Wilcoxon signed ranks test, where appropriate ( $p < 0.05$ ). All data is presented as means ± SD. <sup>a</sup> Data were analysed a Wilcoxon signed ranks test. <sup>b</sup> Data were logarithmically transformed before analysis.

Thrice daily consumption of a novel, pre-meal shot containing a low dose of whey protein increases time in euglycemia during 7days of free-living in individuals with type 2 diabetes. K, Smith
